# Supplementary material for: Mitochondrial Genome and Nuclear Markers Provide New Insight into the Evolutionary History of Macaques
Source: PubMed Central journal article supplement (PMC4852913; doi:10.1371/journal.pone.0154665), 2016-05-02
Supplement: pone.0154665.s001.pdf [file pone.0154665.s001.pdf]

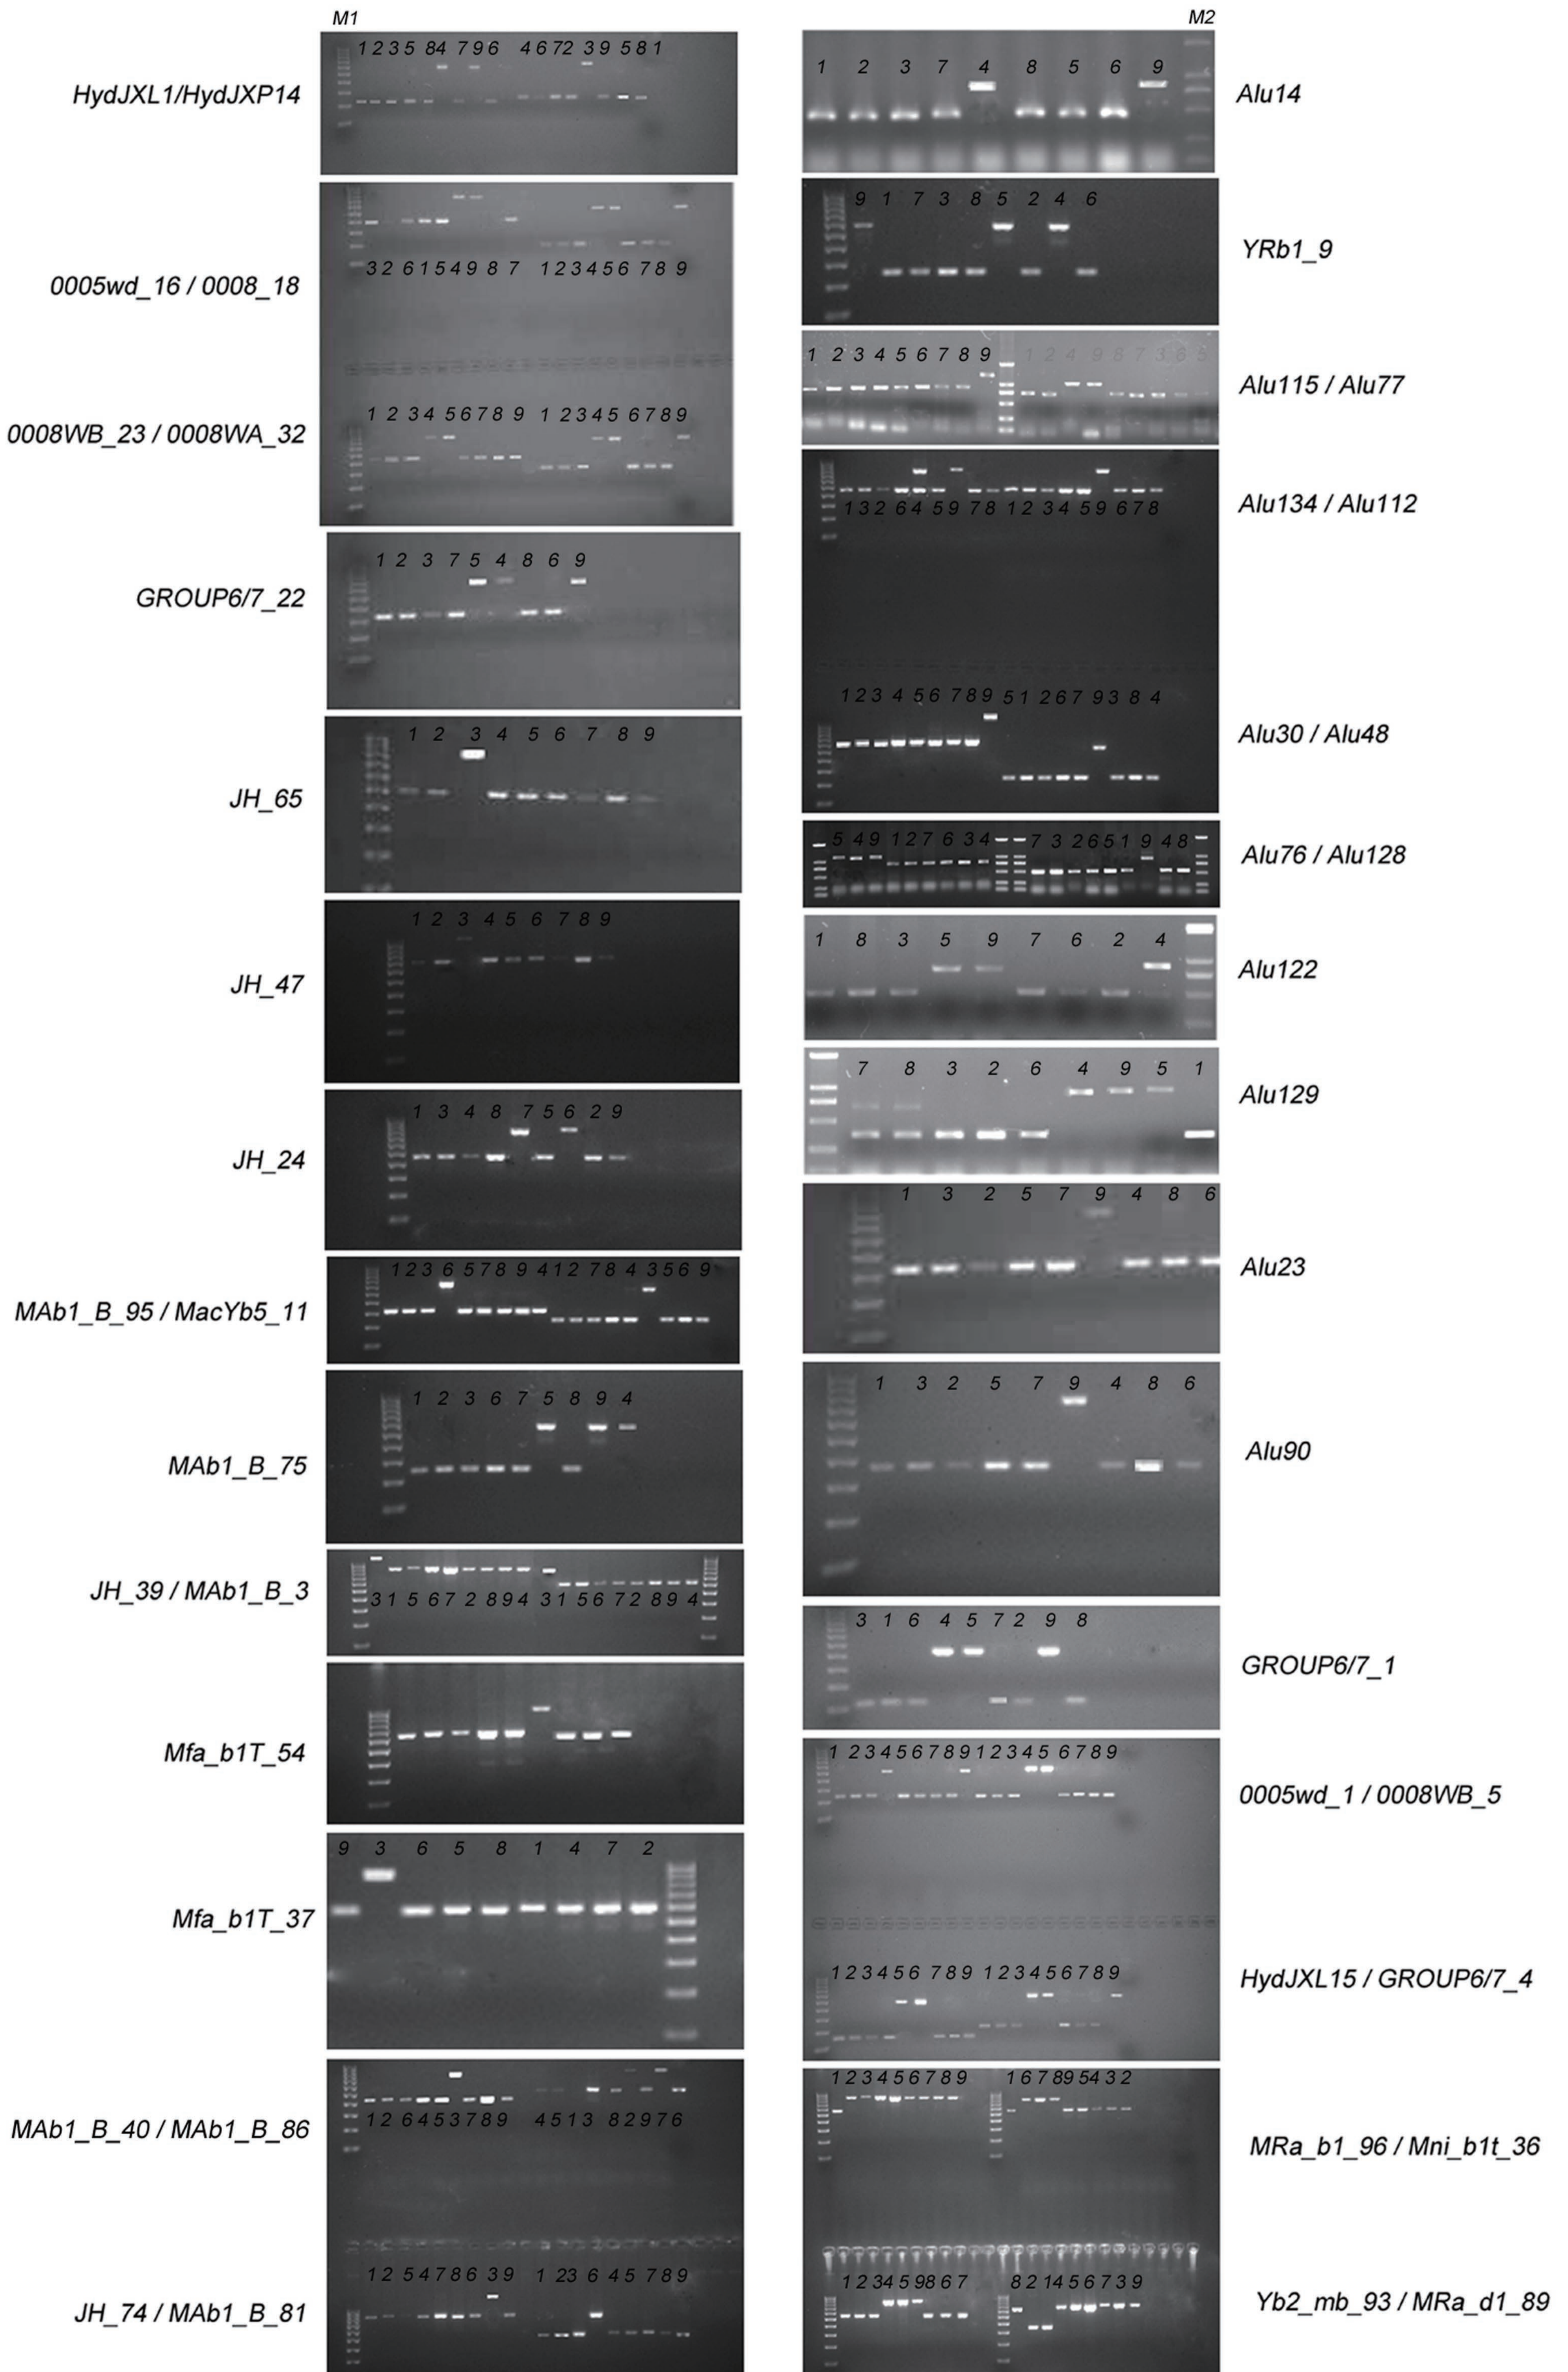

MAb1\_B\_72 / MacYB5\_25

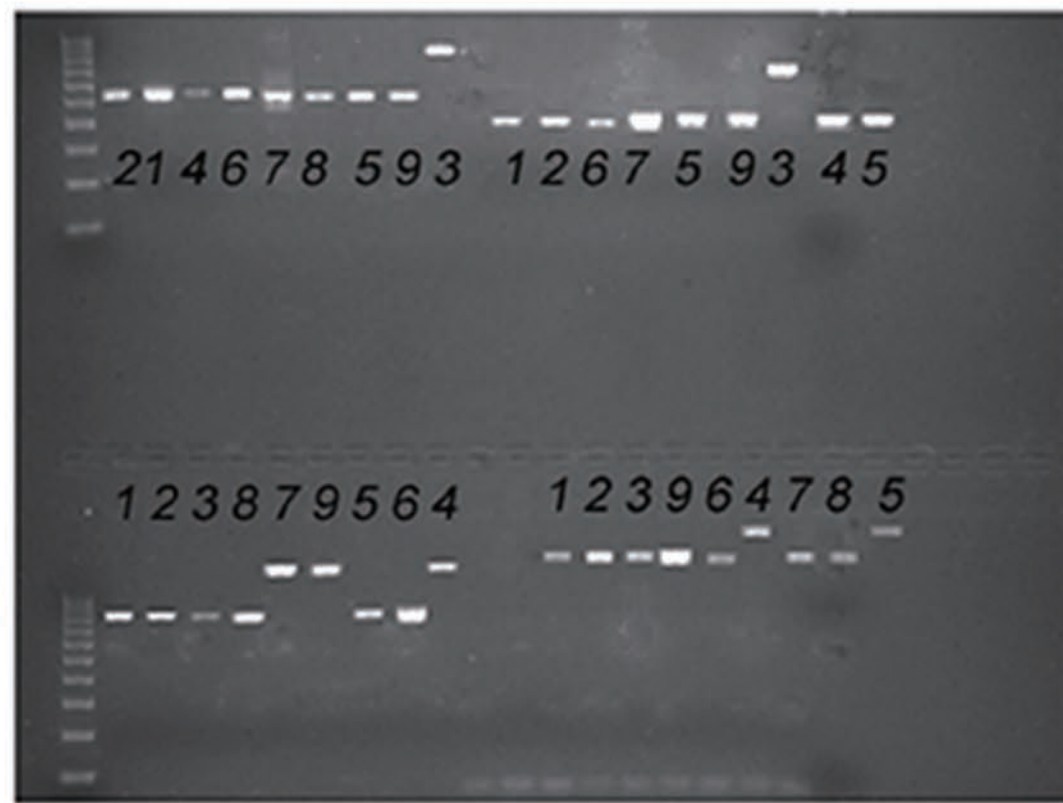

Mfa\_d1T\_22 / MAb1\_B\_92

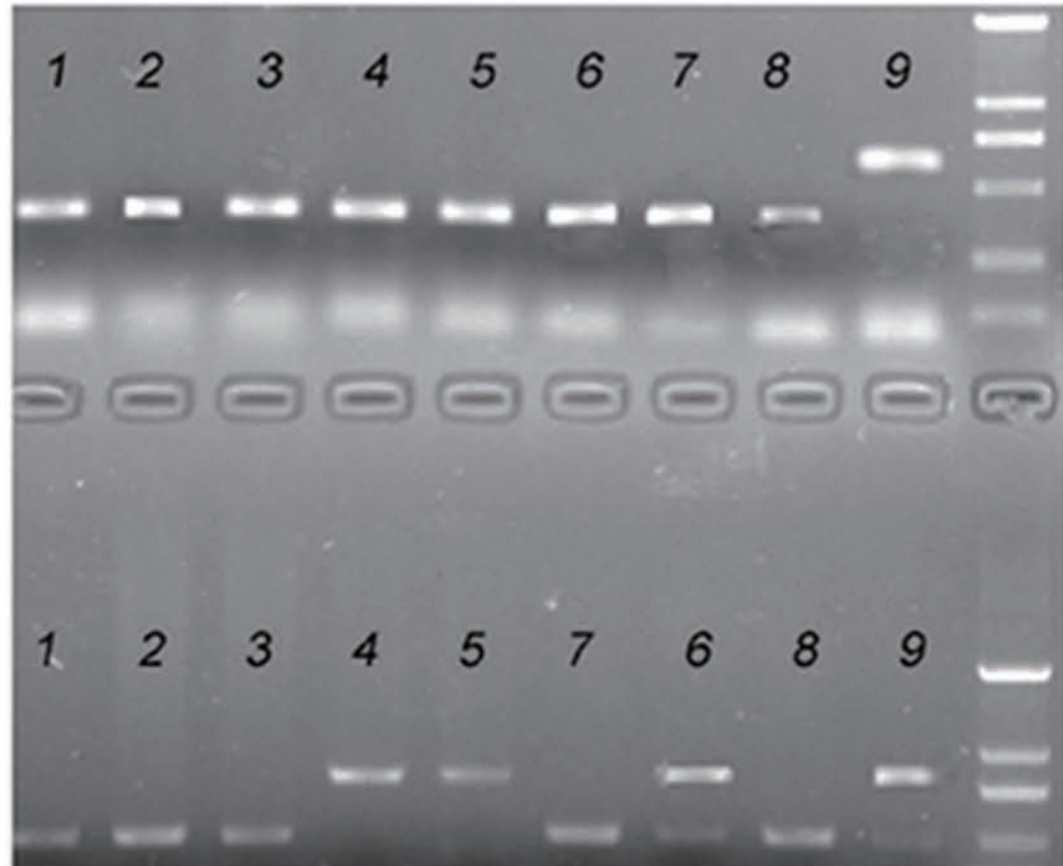

Alu9

Alu109

Yb3\_mt\_25

Yb2\_mb\_15 / MRa\_b1\_59

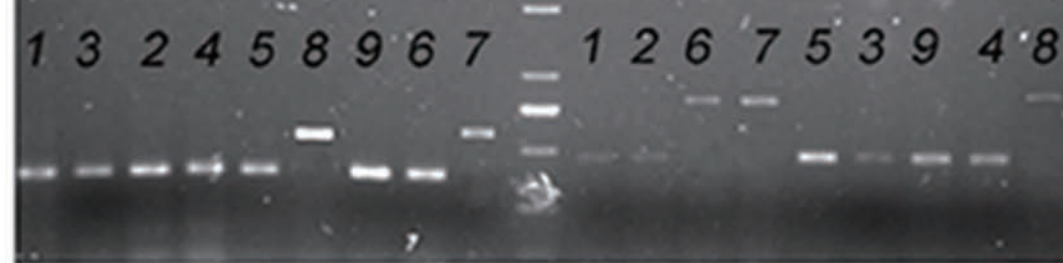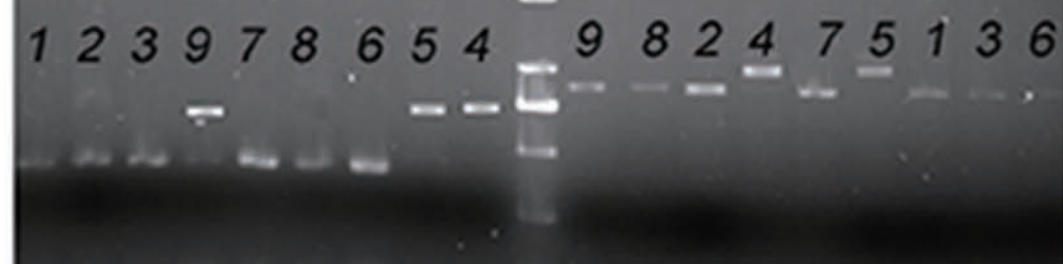

Mfa\_d1t\_53

Yb3\_mt\_20

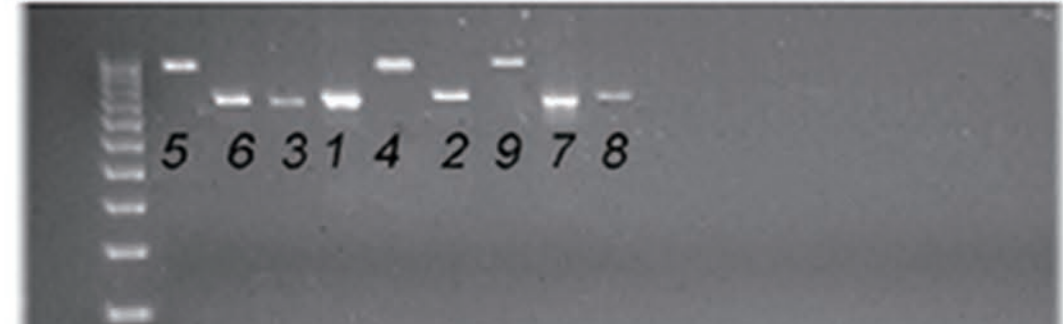

YRb2\_13 / Yb3\_mt\_60

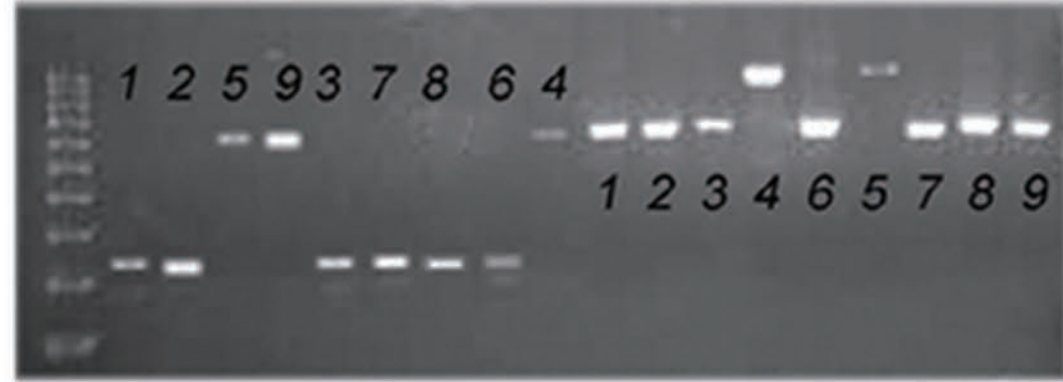

TM2\_mb\_4

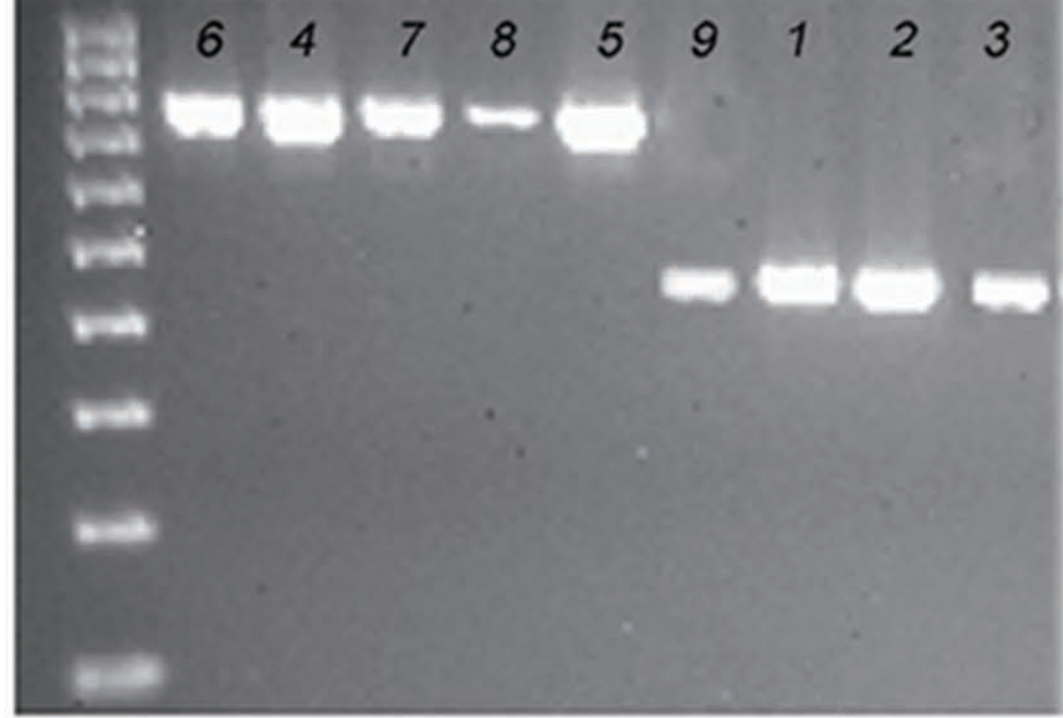

Alu 10

Alu27

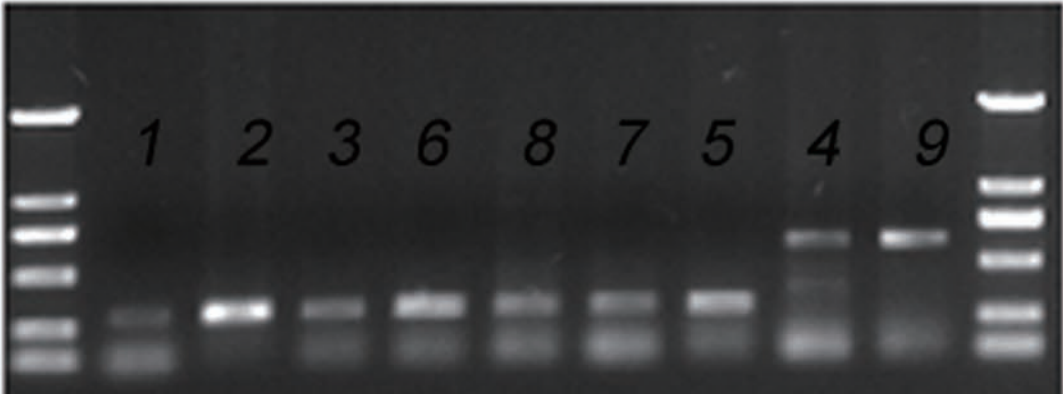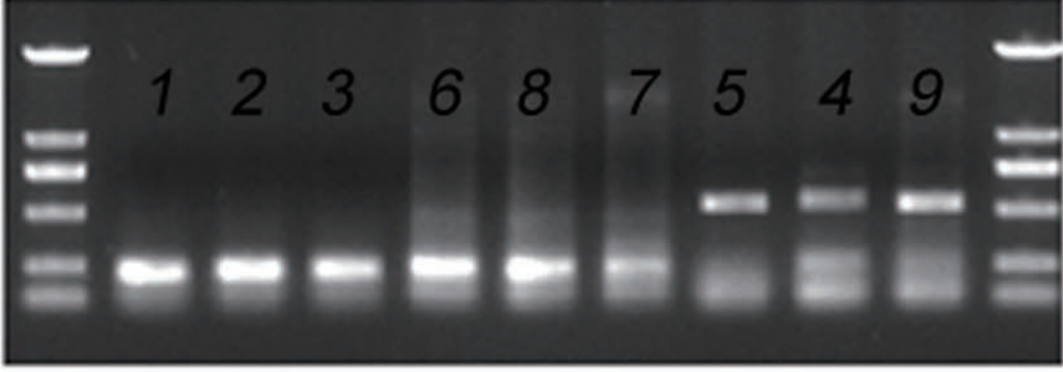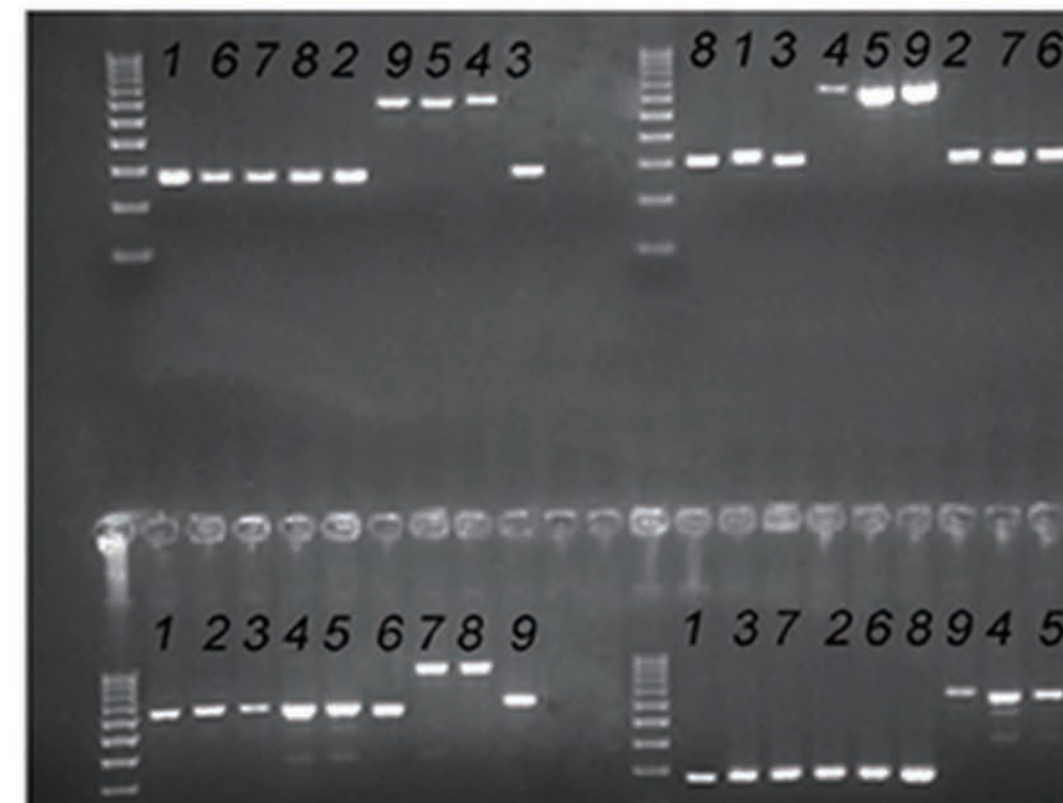

YRb2\_19 / Yb3\_mb\_16

MS\_b1\_12 / TM2\_55t\_13

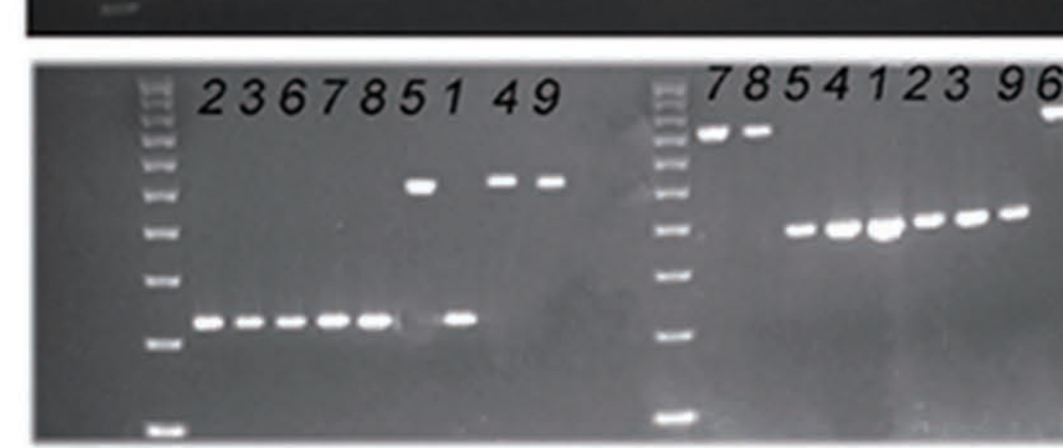

YRb2\_18 / Mni\_b1t\_46

Yb3\_mt\_22 / Mni\_b1t\_-65

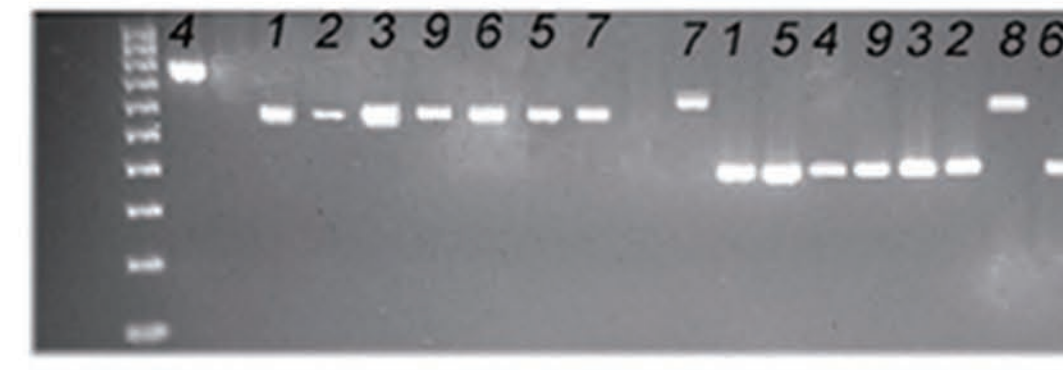

Mni\_b1t\_62

MRa\_b1\_90 / MS\_b1\_118

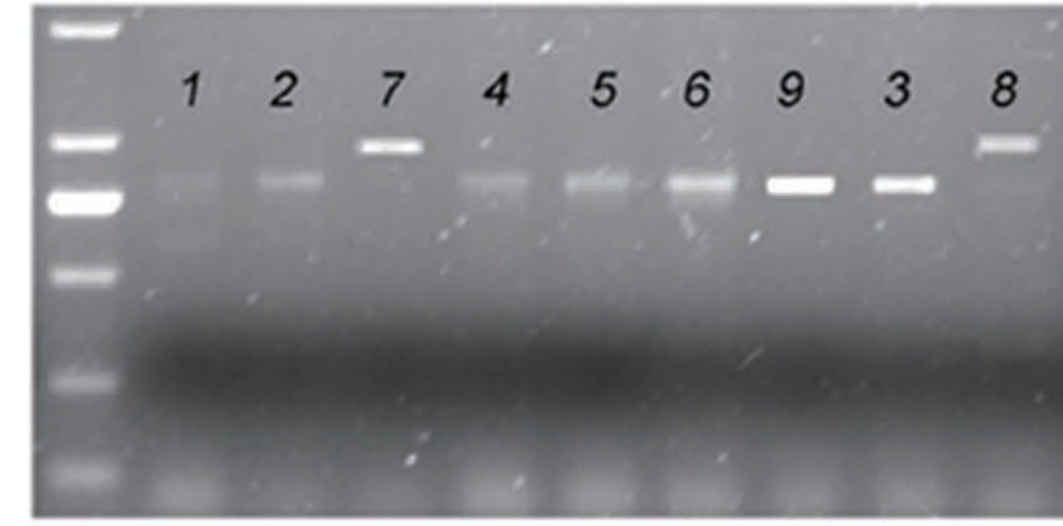

Mni\_d1\_T37 / Mni\_d1\_T74

Mni\_b1t\_51 / Yb3\_mb\_14

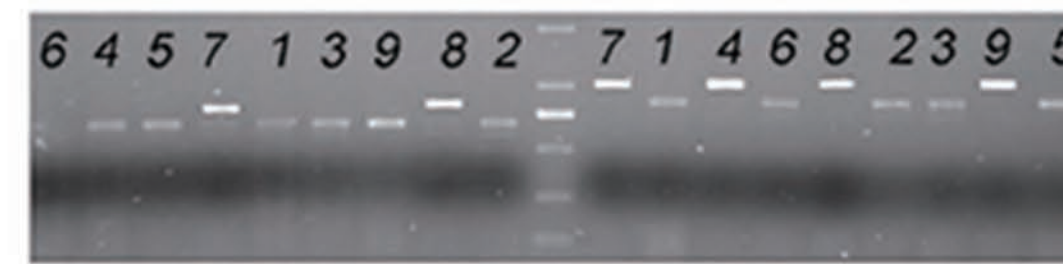

YRb1\_5 / YRb1\_8

MRa\_b1\_28 / Yb\_mb\_3

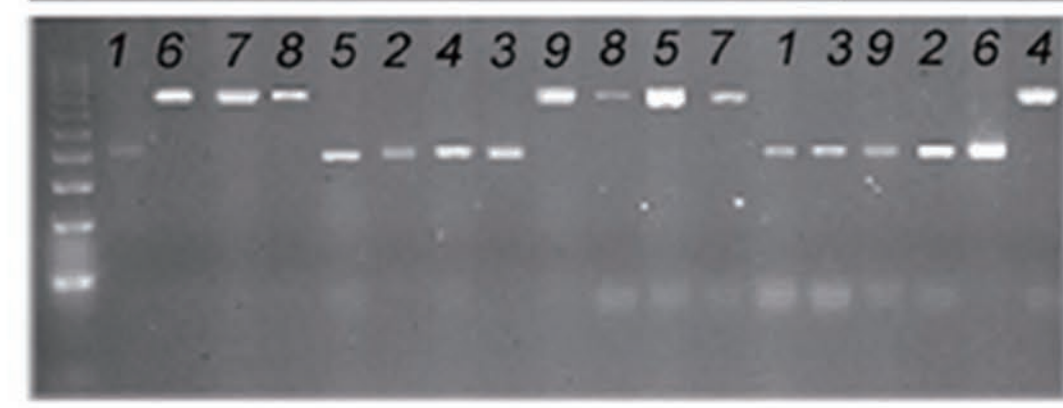

MS\_b1\_113

yb1-mb-53

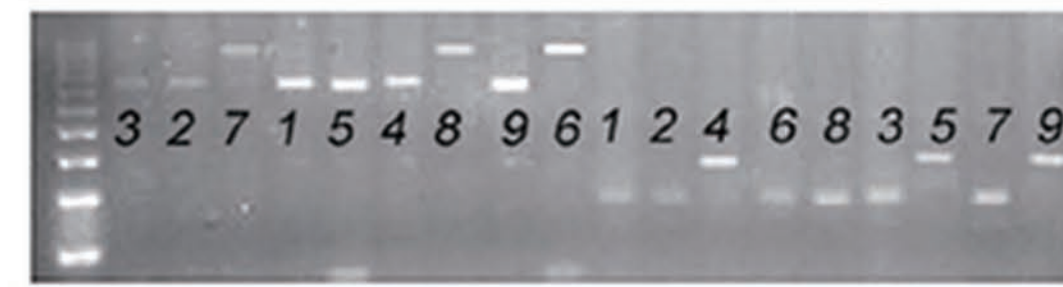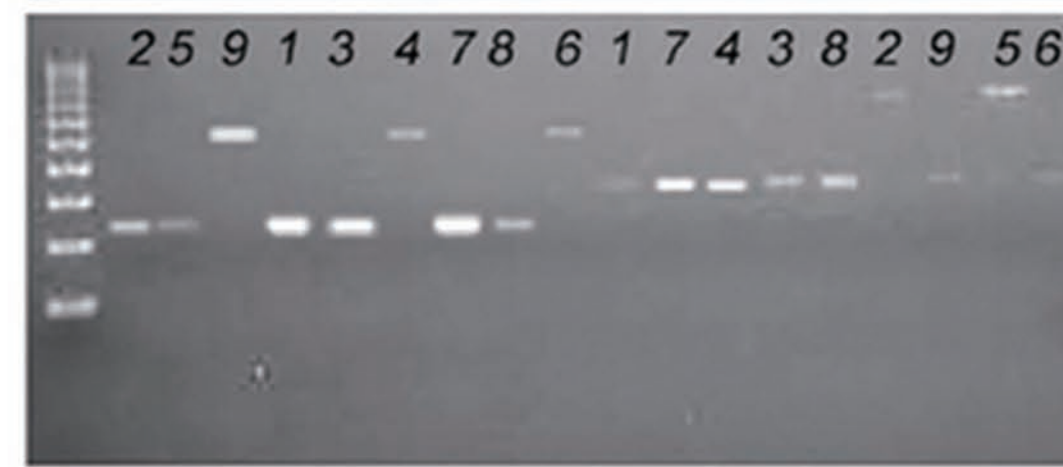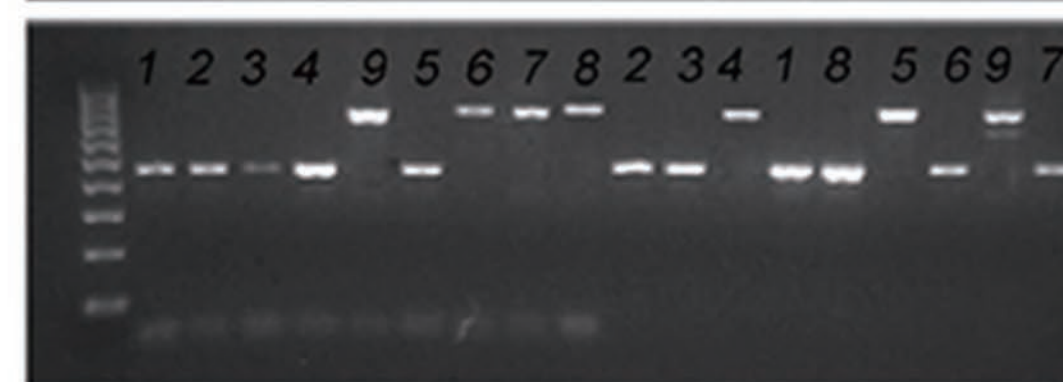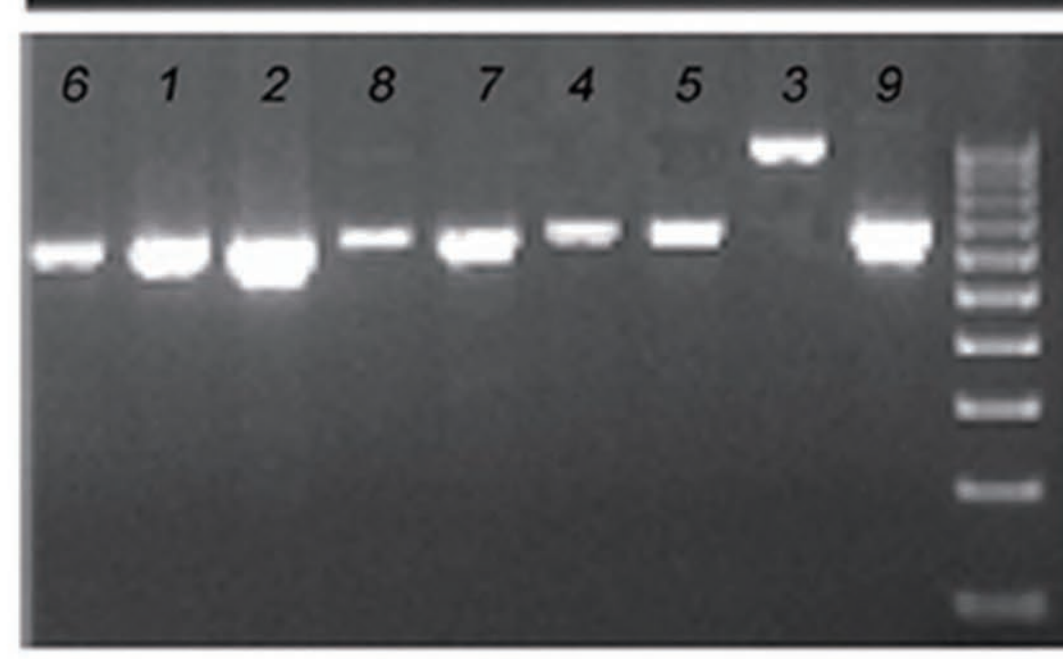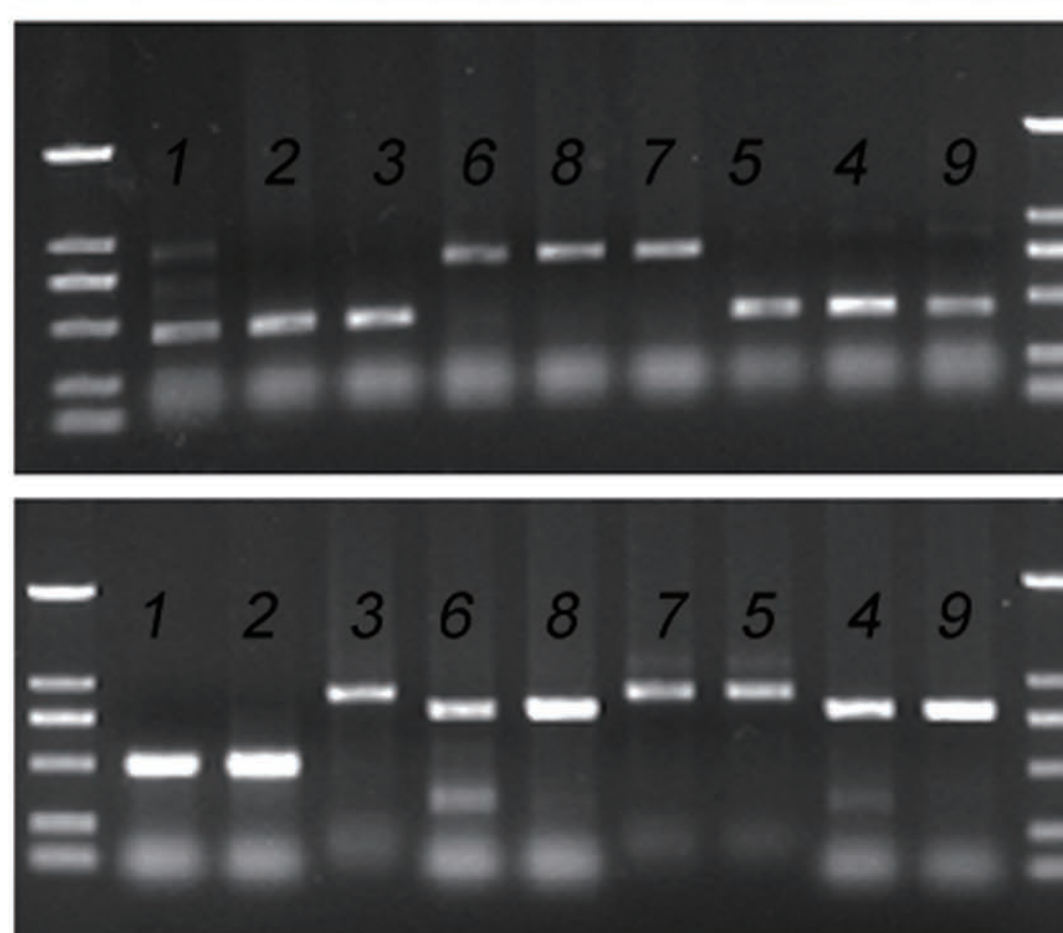

MS-b1-174
