# Supplementary material for: Mitochondrial Genome and Nuclear Markers Provide New Insight into the Evolutionary History of Macaques
Source: PubMed Central journal article supplement (PMC4852913; doi:10.1371/journal.pone.0154665), 2016-05-02

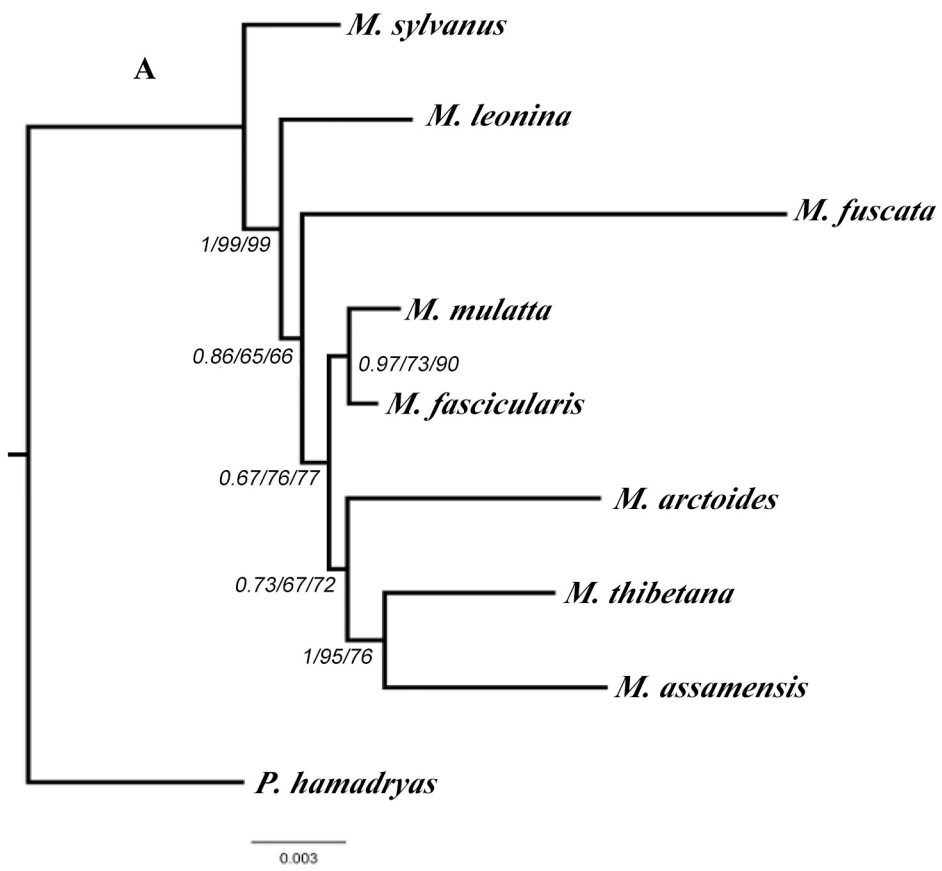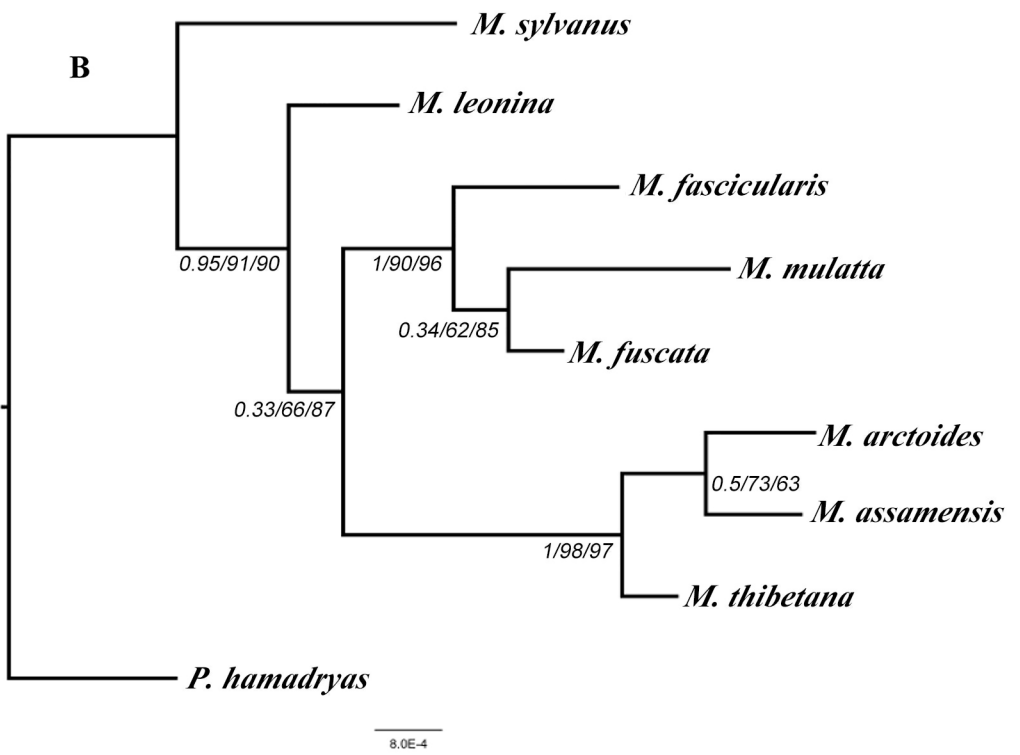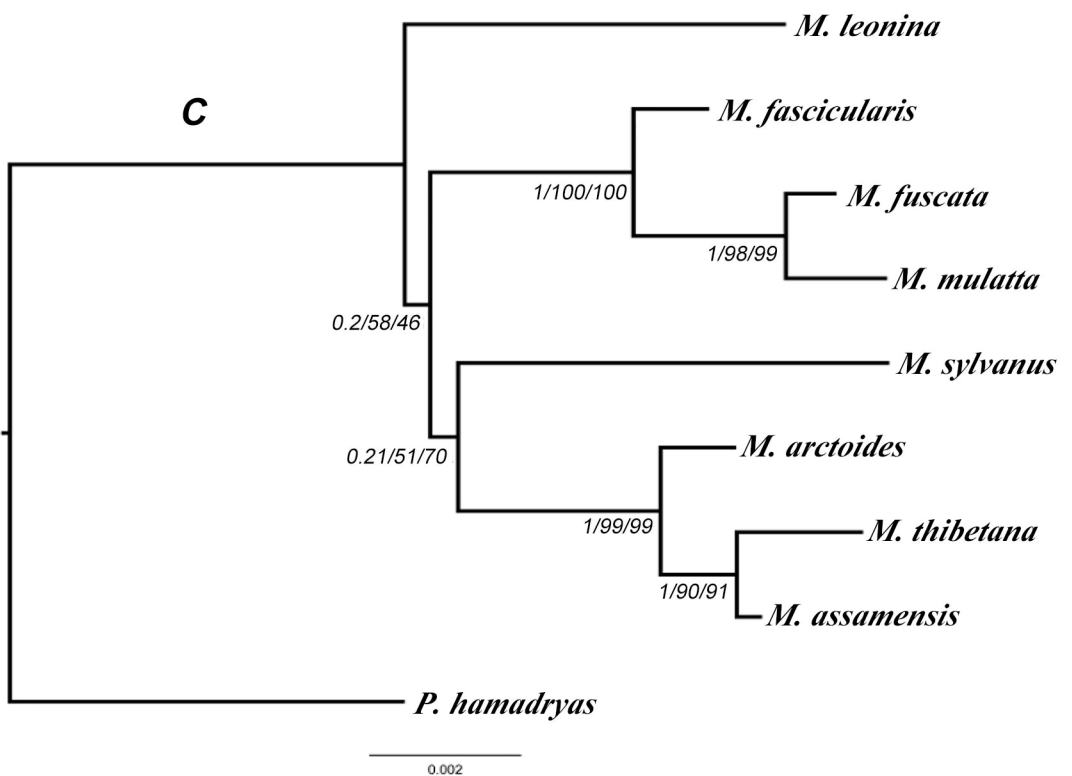

Supplement: pone.0154665.s002.pdf [file pone.0154665.s002.pdf]
